# Supplementary material
Source: PubMed Central journal article supplement (PMC3593661)
Supplement: NIHMS443824-supplement-01.pdf [file NIHMS443824-supplement-01.pdf]

Supplemental Figure. CONSORT Diagram

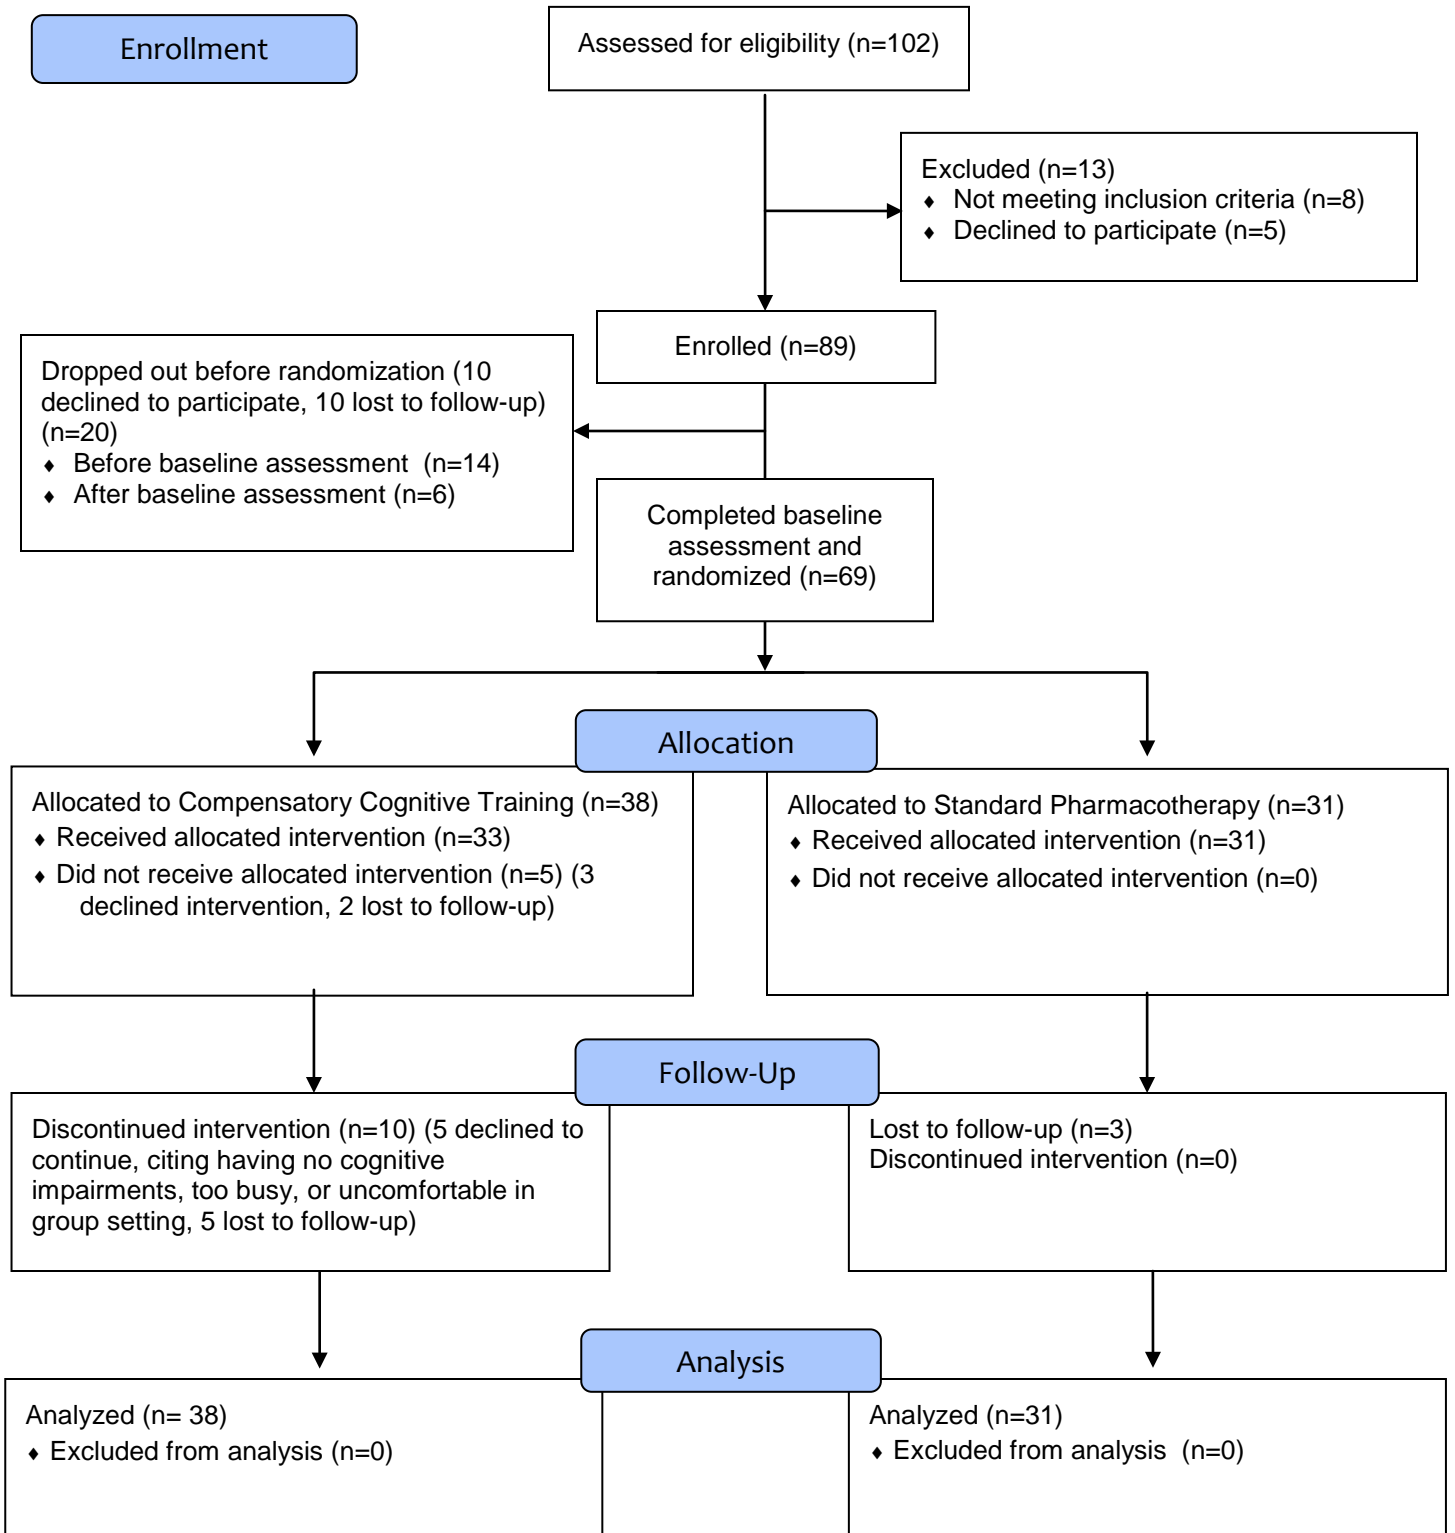



Supplementary Table. Hierarchical Linear Models

|                   | Verbal Learning (HVLt-R recall total) |      |       |        |         | Executive Functioning (WCST total) |      |       |       |         | Processing Speed (Digit Symbol total) |      |       |       |         |
|-------------------|---------------------------------------|------|-------|--------|---------|------------------------------------|------|-------|-------|---------|---------------------------------------|------|-------|-------|---------|
|                   | EE                                    | SE   | t     | df     | p-value | EE                                 | SE   | t     | df    | p-value | EE                                    | SE   | t     | df    | p-value |
| Intercept         | 22.97                                 | 1.07 | 21.42 | 103.82 | <0.001  | 40.91                              | 2.03 | 20.14 | 89.53 | <0.001  | 53.43                                 | 2.53 | 21.16 | 78.15 | <0.001  |
| Visit             |                                       |      |       |        |         |                                    |      |       |       |         |                                       |      |       |       |         |
| Post-treatment    | 1.28                                  | 1.11 | 1.15  | 95.09  | 0.251   | -1.89                              | 1.89 | -1.00 | 89.55 | 0.319   | -1.40                                 | 1.62 | -0.86 | 89.54 | 0.391   |
| 3 Month Follow-up | 0.83                                  | 1.08 | 0.77  | 94.32  | 0.441   | 1.06                               | 1.82 | 0.58  | 89.12 | 0.563   | -2.48                                 | 1.57 | -1.58 | 89.33 | 0.118   |
| Group (CCT)       | -0.04                                 | 0.08 | -0.54 | 103.82 | 0.590   | 0.02                               | 0.15 | 0.16  | 89.53 | 0.876   | -0.29                                 | 0.18 | -1.62 | 78.15 | 0.109   |
| Age               | 1.57                                  | 1.46 | 1.08  | 103.82 | 0.284   | 1.96                               | 2.77 | 0.71  | 89.53 | 0.481   | -2.00                                 | 3.45 | -0.58 | 78.15 | 0.564   |
| Age*Visit         |                                       |      |       |        |         |                                    |      |       |       |         |                                       |      |       |       |         |
| Post Treatment    | 0.00                                  | 0.09 | -0.03 | 100.13 | 0.978   | 0.20                               | 0.14 | 1.37  | 91.02 | 0.176   | 0.03                                  | 0.13 | 0.24  | 91.52 | 0.810   |
| 3 Month Follow-up | 0.05                                  | 0.08 | 0.63  | 99.23  | 0.530   | -0.11                              | 0.14 | -0.78 | 90.46 | 0.438   | 0.10                                  | 0.12 | 0.79  | 91.39 | 0.431   |
| Group*Visit       |                                       |      |       |        |         |                                    |      |       |       |         |                                       |      |       |       |         |
| Post-treatment    | -0.22                                 | 1.63 | -0.14 | 99.16  | 0.892   | 3.87                               | 2.71 | 1.42  | 91.75 | 0.158   | -0.63                                 | 2.39 | -0.26 | 91.20 | 0.792   |
| 3 Month Follow-up | 1.44                                  | 1.57 | 0.91  | 98.61  | 0.363   | 3.04                               | 2.62 | 1.16  | 91.48 | 0.249   | 1.21                                  | 2.31 | 0.52  | 91.10 | 0.602   |

  

|                   | Working Memory (LNS total) |      |       |       |         | Verbal Fluency (COWAT total) |      |       |       |         |
|-------------------|----------------------------|------|-------|-------|---------|------------------------------|------|-------|-------|---------|
|                   | EE                         | SE   | t     | df    | p-value | EE                           | SE   | t     | df    | p-value |
| Intercept         | 8.31                       | 0.49 | 16.89 | 82.70 | <0.001  | 41.86                        | 2.00 | 20.89 | 79.12 | <0.001  |
| Visit             |                            |      |       |       |         |                              |      |       |       |         |
| Post-treatment    | -0.02                      | 0.37 | -0.06 | 90.21 | 0.951   | 0.63                         | 1.42 | 0.44  | 89.19 | 0.657   |
| 3 Month Follow-up | 0.00                       | 0.36 | 0.00  | 89.90 | 0.998   | -0.65                        | 1.38 | -0.47 | 88.92 | 0.636   |
| Group (CCT)       | 0.03                       | 0.03 | 0.93  | 82.70 | 0.353   | -0.09                        | 0.14 | -0.60 | 79.12 | 0.549   |
| Age               | 0.08                       | 0.67 | 0.11  | 82.70 | 0.910   | -0.72                        | 2.74 | -0.26 | 79.12 | 0.793   |
| Age*Visit         |                            |      |       |       |         |                              |      |       |       |         |
| Post Treatment    | -0.01                      | 0.03 | -0.43 | 92.93 | 0.667   | -0.13                        | 0.11 | -1.13 | 91.56 | 0.262   |
| 3 Month Follow-up | -0.04                      | 0.03 | -1.48 | 92.69 | 0.143   | 0.09                         | 0.11 | 0.84  | 91.36 | 0.404   |
| Group*Visit       |                            |      |       |       |         |                              |      |       |       |         |
| Post-treatment    | -0.19                      | 0.54 | -0.35 | 92.46 | 0.726   | 0.07                         | 2.10 | 0.03  | 91.13 | 0.974   |
| 3 Month Follow-up | -0.04                      | 0.53 | -0.07 | 92.30 | 0.946   | 1.06                         | 2.03 | 0.52  | 90.99 | 0.601   |

  

|                   | Positive Symptom Severity (PANSS) |      |       |       |         | Depressive Symptoms (HAM-D) |      |       |       |         | Social Skills Performance (SSPA) |      |       |        |         |
|-------------------|-----------------------------------|------|-------|-------|---------|-----------------------------|------|-------|-------|---------|----------------------------------|------|-------|--------|---------|
|                   | EE                                | SE   | t     | df    | p-value | EE                          | SE   | t     | df    | p-value | EE                               | SE   | t     | df     | p-value |
| Intercept         | 17.28                             | 1.12 | 15.43 | 95.55 | <0.001  | 11.50                       | 1.29 | 8.90  | 87.54 | <0.001  | 31.04                            | 1.18 | 26.35 | 101.44 | <0.001  |
| Visit             |                                   |      |       |       |         |                             |      |       |       |         |                                  |      |       |        |         |
| Post-treatment    | -0.87                             | 1.07 | -0.81 | 91.62 | 0.418   | -0.99                       | 1.14 | -0.86 | 84.67 | 0.390   | -0.52                            | 1.19 | -0.44 | 95.00  | 0.664   |
| 3 Month Follow-up | 0.19                              | 1.04 | 0.18  | 91.00 | 0.854   | 1.42                        | 1.12 | 1.27  | 84.33 | 0.209   | -0.90                            | 1.14 | -0.78 | 94.05  | 0.435   |

|                   |       |      |       |       |       |       |      |       |       |       |       |      |       |        |       |
|-------------------|-------|------|-------|-------|-------|-------|------|-------|-------|-------|-------|------|-------|--------|-------|
| Group (CCT)       | -0.05 | 0.08 | -0.62 | 95.55 | 0.535 | -0.03 | 0.09 | -0.31 | 85.53 | 0.755 | 0.04  | 0.08 | 0.43  | 101.44 | 0.667 |
| Age               | -1.12 | 1.53 | -0.73 | 95.55 | 0.465 | 0.45  | 1.74 | 0.26  | 86.64 | 0.799 | 0.28  | 1.61 | 0.18  | 101.44 | 0.860 |
| Age*Visit         |       |      |       |       |       |       |      |       |       |       |       |      |       |        |       |
| Post Treatment    | 0.04  | 0.08 | 0.50  | 95.91 | 0.616 | -0.01 | 0.09 | -0.10 | 87.92 | 0.920 | -0.03 | 0.09 | -0.38 | 99.35  | 0.705 |
| 3 Month Follow-up | -0.04 | 0.08 | -0.56 | 95.38 | 0.580 | -0.16 | 0.08 | -1.86 | 87.54 | 0.067 | -0.02 | 0.09 | -0.24 | 98.59  | 0.813 |
| Group*Visit       |       |      |       |       |       |       |      |       |       |       |       |      |       |        |       |
| Post-treatment    | -0.27 | 1.57 | -0.17 | 95.13 | 0.862 | -0.48 | 1.66 | -0.29 | 87.45 | 0.775 | 0.50  | 1.73 | 0.29  | 98.56  | 0.774 |
| 3 Month Follow-up | -1.55 | 1.54 | -1.01 | 94.90 | 0.316 | -1.71 | 1.65 | -1.03 | 87.39 | 0.305 | 0.87  | 1.67 | 0.52  | 98.01  | 0.604 |

|                   | CPSA Cognitive Problems |      |       |       |                  | CPSA Cognitive Strategies |      |       |        |                  |
|-------------------|-------------------------|------|-------|-------|------------------|---------------------------|------|-------|--------|------------------|
|                   | EE                      | SE   | t     | df    | p-value          | EE                        | SE   | t     | df     | p-value          |
| Intercept         | 0.93                    | 0.09 | 10.79 | 83.20 | <b>&lt;0.001</b> | 1.44                      | 0.09 | 16.39 | 102.56 | <b>&lt;0.001</b> |
| Visit             |                         |      |       |       |                  |                           |      |       |        |                  |
| Post-treatment    | -0.05                   | 0.07 | -0.70 | 85.99 | 0.487            | -0.02                     | 0.09 | -0.19 | 92.99  | 0.849            |
| 3 Month Follow-up | -0.10                   | 0.07 | -1.48 | 86.27 | 0.143            | -0.01                     | 0.09 | -0.12 | 93.21  | 0.905            |
| Group (CCT)       | 0.01                    | 0.01 | 1.13  | 81.97 | 0.261            | 0.00                      | 0.01 | -0.56 | 100.97 | 0.579            |
| Age               | 0.22                    | 0.12 | 1.89  | 82.43 | 0.063            | -0.14                     | 0.12 | -1.14 | 101.57 | 0.257            |
| Age*Visit         |                         |      |       |       |                  |                           |      |       |        |                  |
| Post Treatment    | 0.00                    | 0.01 | 0.60  | 88.85 | 0.547            | 0.01                      | 0.01 | 1.39  | 97.59  | 0.168            |
| 3 Month Follow-up | 0.00                    | 0.00 | 0.86  | 88.68 | 0.390            | 0.00                      | 0.01 | 0.41  | 96.99  | 0.684            |
| Group*Visit       |                         |      |       |       |                  |                           |      |       |        |                  |
| Post-treatment    | -0.24                   | 0.10 | -2.37 | 88.46 | <b>0.020</b>     | 0.47                      | 0.13 | 3.65  | 96.91  | <b>0.000</b>     |
| 3 Month Follow-up | -0.11                   | 0.10 | -1.12 | 88.54 | 0.268            | 0.40                      | 0.12 | 3.23  | 96.79  | <b>0.002</b>     |

Note. Significant findings are indicated in bold font. CCT = Compensatory Cognitive Training; COWAT = Controlled Oral Word Association Test; CPSA = Cognitive Problems and Strategies Assessment; EE = Effect Estimate; HAM-D = Hamilton Depression Rating Scale; HVLN-R = Hopkins Verbal Learning Test-Revised; LNS = Letter-Number Sequencing; PANSS = Positive and Negative Syndrome Scale; SE = Standard Error; SSPA = Social Skills Performance Assessment; WCST = Wisconsin Card Sorting Test
